# Supplementary material for: A Mixture of Cod and Scallop Protein Reduces Adiposity and Improves Glucose Tolerance in High-Fat Fed Male C57BL/6J Mice
Source: PubMed Central journal article supplement (PMC4229262; doi:10.1371/journal.pone.0112859), 2014-11-12
Supplement: pone.0112859.s001.pdf [file pone.0112859.s001.pdf]

## Supporting Information

**Table S1.** Genes and corresponding primer sequences used for qRT-PCR.

| Abbreviation  | Gene name                                                | 5'prime                   | 3'prime               |
|---------------|----------------------------------------------------------|---------------------------|-----------------------|
| <i>Srebf1</i> | Sterol regulatory element-binding transcription factor 1 | GGAGCCATGGATTGCACATT      | GCTTCCAGAGAGGAGCCCAG  |
| <i>Acaca</i>  | Acetyl-Coenzyme A carboxylase alpha                      | TGCTGCCCCATCCCCGGG        | TCGAACTCTCACTGACACG   |
| <i>Fasn</i>   | Fatty acid synthase                                      | CTTCGCCAACTCTACCATGG      | TCCACACCCATGAGCGAGT   |
| <i>Scd-1</i>  | Stearoyl-CoA desaturase-1                                | GATGTTCCAGAGGAGGTACTACAAG | ATGAAGCACATCAGCAGGAGG |
| <i>Dgat-1</i> | Diacylglycerol acyltransferase-1                         | GGTGCCATCGTCTGCAAGA       | CCACCAGGATGCCATACTTGA |
| <i>Hmgcr</i>  | 3-Hydroxy-3-Methylglutaryl-Coenzyme A reductase          | ATCATCCTGACGATAACGCG      | GCCAGCAATACCCAGAATGT  |
| <i>Pck-1</i>  | Phosphoenol pyruvate carboxykinase-1                     | CCACACCATTGCAATTATGC      | CATATTTCTTCAGCTTGCGG  |
| <i>Hk2</i>    | Hexokinase 2                                             | AGAGAACAAGGGCGAGGAG       | GGAAGCGGACATCACAATC   |
| <i>Hk4</i>    | Hexokinase 4                                             | CAAGAGGAGAGGGGACTTTG      | TTGGCGGTCTTCATAGTAGC  |
| <i>Pfkl</i>   | Phosphofructokinase, liver, B-type                       | GCCTATCTCATCCAGCTACG      | CTTGCTACTCAGGATTCGGT  |
| <i>Pklr</i>   | Pyruvate kinase liver and red blood cell                 | GAGTCTTCCCCTTGCTCTACC     | CCTGTCACCACAATCACCA   |
| <i>Tbp</i>    | TATA-box binding proten                                  | ACCCTTCACCAATGACTCCTATG   | ATGATGACTGCAGCAAATCGC |
